# Supplementary material for: Supramolecular polymer networks of building blocks prepared via RAFT polymerization
Source: Royal Society of Chemistry journal article supplement (doi:10.1039/c3py01624b), 2013-12-11
Supplement: c3py01624b.pdf [file c3py01624b.pdf]

Supporting Information for

# Supramolecular Polymer Networks of Building Blocks Prepared via RAFT Polymerization

*Martin Hetzer,<sup>1</sup> Bernhard V. K. J. Schmidt,<sup>2</sup> Christopher Barner-Kowollik<sup>2,\*</sup>*

*and Helmut Ritter<sup>1,\*</sup>*

<sup>1</sup>Lehrstuhl für Präparative Polymerchemie, Institut für Organische Chemie und  
Makromolekulare Chemie, Heinrich-Heine Universität, Universitätsstraße 1, Geb. 26.33.00,  
40225 Düsseldorf, Germany

<sup>2</sup>Preparative Macromolecular Chemistry, Institut für Technische Chemie und Polymerchemie,  
Karlsruhe Institute of Technology (KIT), Engesserstraße 18, 76128 Karlsruhe, Germany and  
Institut für Biologische Grenzflächen, Karlsruhe Institute of Technology (KIT), Hermann-  
von-Helmholtz-Platz 1, 76344 Eggenstein-Leopoldshafen, Germany

\* (H.R.) Tel (+49) 211 81-14760; Fax: (+49) 211 81-15840; E-mail: h.ritter@uni-  
duesseldorf.de; (C.B.-K.) Tel (+49) 721 608-45642; Fax (+49) 721 608-45740; E-mail:  
christopher.barner-kowollik@kit.edu.

## Additional Experimental Procedures

*Synthesis of bis(6-(adamantan-1-ylamino)-6-oxohexyl) 2,2'-(thiocarbonylbis(sulfanediyl))-bis(2-methylpropanoate) (CTAI)*

**CMP** (0.25 g, 0.88 mmol, 1.0 eq.), *N*-(adamantan-1-yl)-6-hydroxyhexanamide (0.75 g, 2.83 mmol, 3.2 eq.) and triphenylphosphine (0.74 g, 2.82 mmol, 3.2 eq.) were dissolved in dry THF (10 mL) in a 50 mL round bottom flask. At 0 °C, DIAD (0.6 mL, 3.06 mmol, 3.5 eq.) in dry THF (5 mL) was added dropwise. The reaction mixture was stirred at ambient temperature overnight and additionally stirred for 3 h at 40 °C. After cooling to ambient temperature, DCM (30 mL) was added and the organic phase was washed with saturated NaHCO<sub>3</sub>-solution (2×30 mL). The organic phase was dried over magnesium sulfate, filtered and concentrated in vacuo. The residue was purified via column chromatography on silica-gel with *n*-hexane/ethyl acetate as eluent that was gradually changed from 3:1 to 1:1. The purified product was obtained as yellow oil (0.52 g, 0.67 mmol, 76%).

<sup>1</sup>H-NMR (400 MHz, CDCl<sub>3</sub>): [ $\delta$ , ppm] = 5.32 (br s, 2H, **NH**), 4.05 (t, 4H, **CH<sub>2</sub>-O-C=O**), 2.12 - 2.02 (m, 10 H, 6x **CH<sub>adamantyl</sub>**; 2x **CH<sub>2</sub>-C=O**), 2.01 - 1.94 (m, 12H, 6x **CH<sub>2,adamantyl</sub>-C-NH**), 1.73 - 1.51 (m, 28H, 4x (**CH<sub>3</sub>)<sub>2</sub>-C**; 2x **CH<sub>2</sub>-CH<sub>2</sub>-C=O**; 6x **CH<sub>2,adamantyl</sub>**), 1.40 - 1.29 (m, 4H, 2x **CH<sub>2</sub>-CH<sub>2</sub>-O**), 1.28 - 1.18 (m, 4H, 2x **CH<sub>2</sub>-CH<sub>2</sub>-CH<sub>2</sub>-C=O**).

<sup>13</sup>C-NMR (100 MHz, CDCl<sub>3</sub>): [ $\delta$ , ppm] = 218.6 (**C=S**), 172.2 and 172.9 (4x **C=O**), 66.1 (2x **CH<sub>2</sub>-O-C=O**), 56.3 (2x **C(CH<sub>3</sub>)<sub>2</sub>**), 51.9 (2x **C-NH**), 41.8 (6x **CH<sub>2,adamantyl</sub>-C-NH**), 37.6 (2x **CH<sub>2</sub>-C=O**), 36.5 (6x **CH<sub>2,adamantyl</sub>**), 29.6 (6x **CH<sub>adamantyl</sub>**), 28.3 (2x **CH<sub>2</sub>-CH<sub>2</sub>-O-C=O**), 25.7 and 25.5 (2x **CH<sub>2</sub>-CH<sub>2</sub>-CH<sub>2</sub>-C=O**; 2x **CH<sub>2</sub>-CH<sub>2</sub>-C=O**), 25.3 (4x (**CH<sub>3</sub>)<sub>2</sub>-C**).

ESI-MS: [**M** + Na<sup>+</sup>]<sub>exp</sub> = 799.33 *m/z* and [**M** + Na<sup>+</sup>]<sub>calc</sub> = 799.38 *m/z* (refer to Figure S5).

*Synthesis of N,N,N-(tris-1-(mono-(6-desoxy)- $\beta$ -CD)-1H-1,2,3-triazol-4-yl)methanamine ( $\beta$ -CD<sub>3</sub>)*

Modified from a literature procedure,<sup>1,2</sup> in a 50 mL Schlenk tube equipped with a stirring-bar tripropargylamine (34 mg, 0.26 mmol, 1.0 eq.),  $\beta$ -CD-N<sub>3</sub> (1.00 g, 0.86 mmol, 3.3 eq.) and PMDETA (0.16 mL, 0.77 mmol, 3.0 eq.) were dissolved in DMF (11 mL). The reaction mixture was degassed by three freeze-pump-thaw cycles and the tube was backfilled with argon before CuBr (112 mg, 0.78 mmol, 3.0 eq.) was added under a flow of argon. The tube was sealed again and subjected to two additional freeze-pump-thaw cycles. After the tube was backfilled with argon, the reaction vessel was immersed in an oil bath at 70 °C for 4 d. After cooling to ambient temperature the product was precipitated in an excess of acetone. The product was filtered, dissolved in 5 wt.% EDTA-solution (10 mL) and dialyzed with a SpectraPor3 membrane (MWCO = 2000 Da) for 3 days at ambient temperature. The solvent was removed by lyophilization to yield  $\beta$ -CD<sub>3</sub> as an off-white solid (574 mg, 0.16 mmol, 61%).

<sup>1</sup>H NMR (600 MHz, D<sub>2</sub>O): [ $\delta$ , ppm] = 8.04 (s, 3H, 3x **H**<sub>triazole</sub>), 5.15 - 4.98 (m, 21H, 18x CD-**CH**-1; 3x CD-**CH**-1'), 4.69 (dd, 3H, 3x N-**CH**(*gem*)<sub>2</sub>-triazole), 4.27 (t, 3H, 3x N-**CH**(*gem*)<sub>2</sub>-triazole), 4.11 - 3.44 (m, 120H, 21x CD-**CH**-2,3,4,5; 18x CD-**CH**<sub>2</sub>-6), 3.21 (d, 3H, 3x CD-**CH**(*gem*)<sub>2</sub>-6'), 2.95 (d, 3H, 3x CD-**CH**(*gem*)<sub>2</sub>-6').

ESI-MS: [M + 2Na<sup>2+</sup>]<sub>exp</sub> = 1828.33 *m/z* and [M + 2Na<sup>2+</sup>]<sub>calc</sub> = 1828.0926 *m/z* (refer to Figure S6 and Table S2).

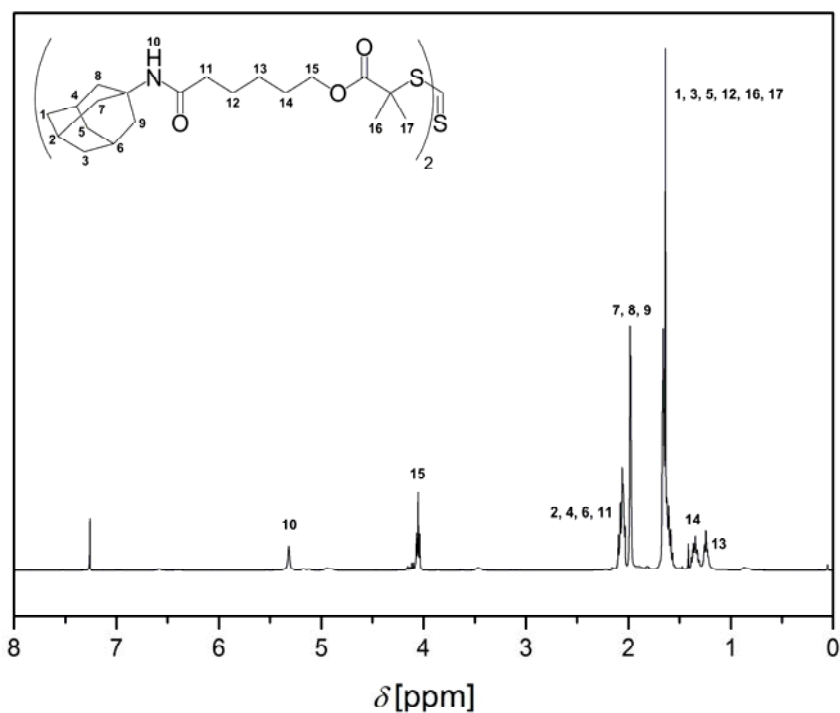

**Figure S1.** <sup>1</sup>H-NMR spectrum of bis(6-(adamantan-1-ylamino)-6-oxohexyl) 2,2'-(thiocarbonylbis(sulfanediyl))bis(2-methylpropanoate) (CTA1) in CDCl<sub>3</sub>.

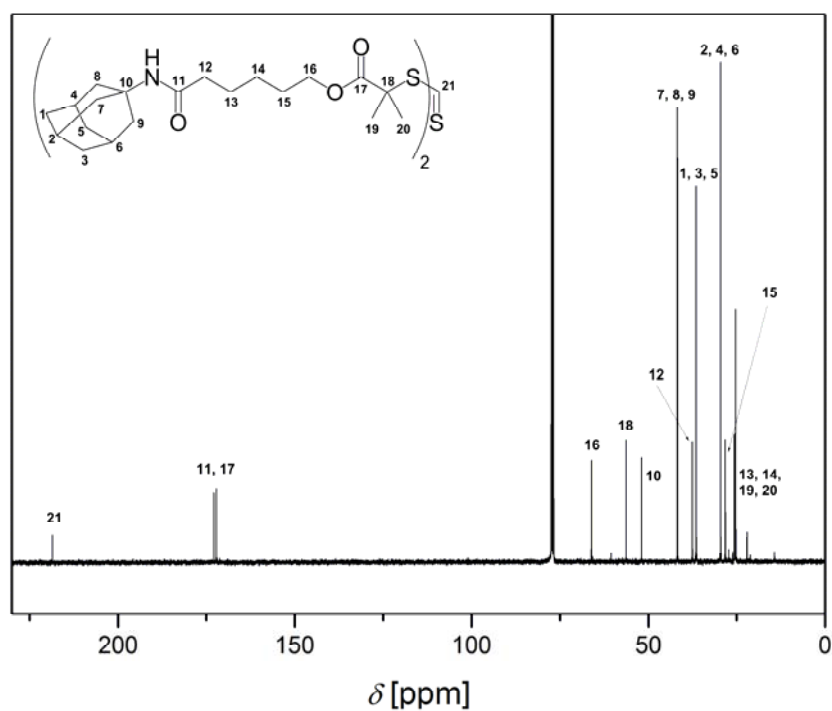

**Figure S2.** <sup>13</sup>C-NMR spectrum of bis(6-(adamantan-1-ylamino)-6-oxohexyl) 2,2'-(thiocarbonylbis(sulfanediyl))bis(2-methylpropanoate) (CTA1) in CDCl<sub>3</sub>.

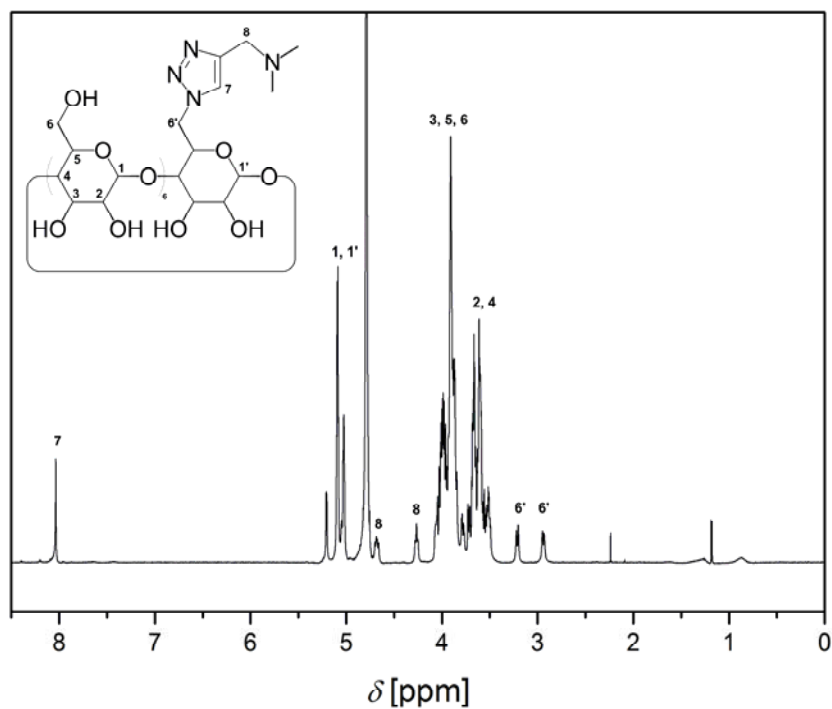

**Figure S3.** <sup>1</sup>H-NMR spectrum of  $N,N,N$ -(tris-1-(mono-(6-desoxy)- $\beta$ -CD)-1H-1,2,3-triazol-4-yl)methanamine ( $\beta$ -CD<sub>3</sub>) in D<sub>2</sub>O.

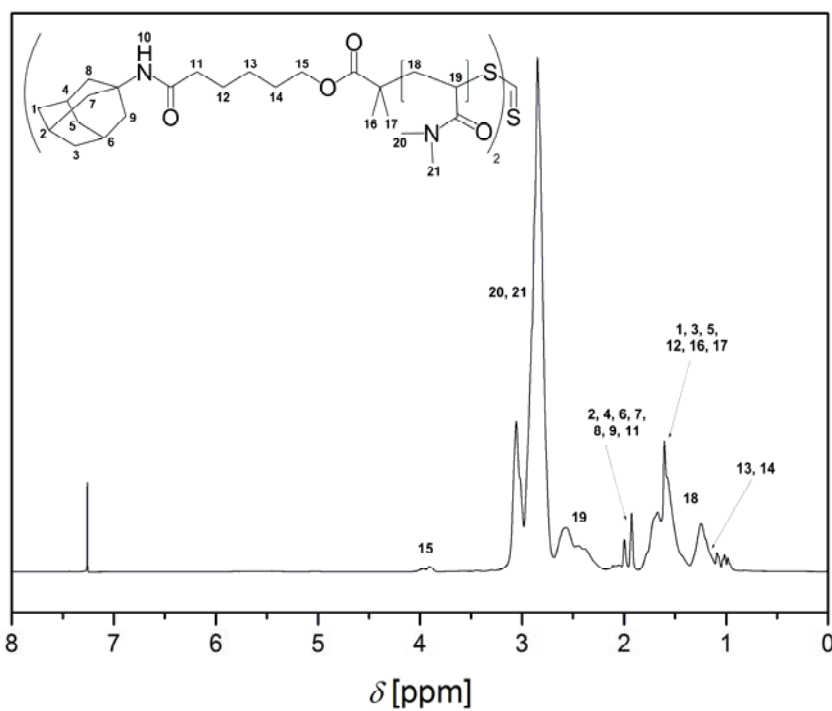

**Figure S4.** <sup>1</sup>H-NMR spectrum of PDMA<sub>122</sub>-ADA<sub>2</sub> in CDCl<sub>3</sub>.

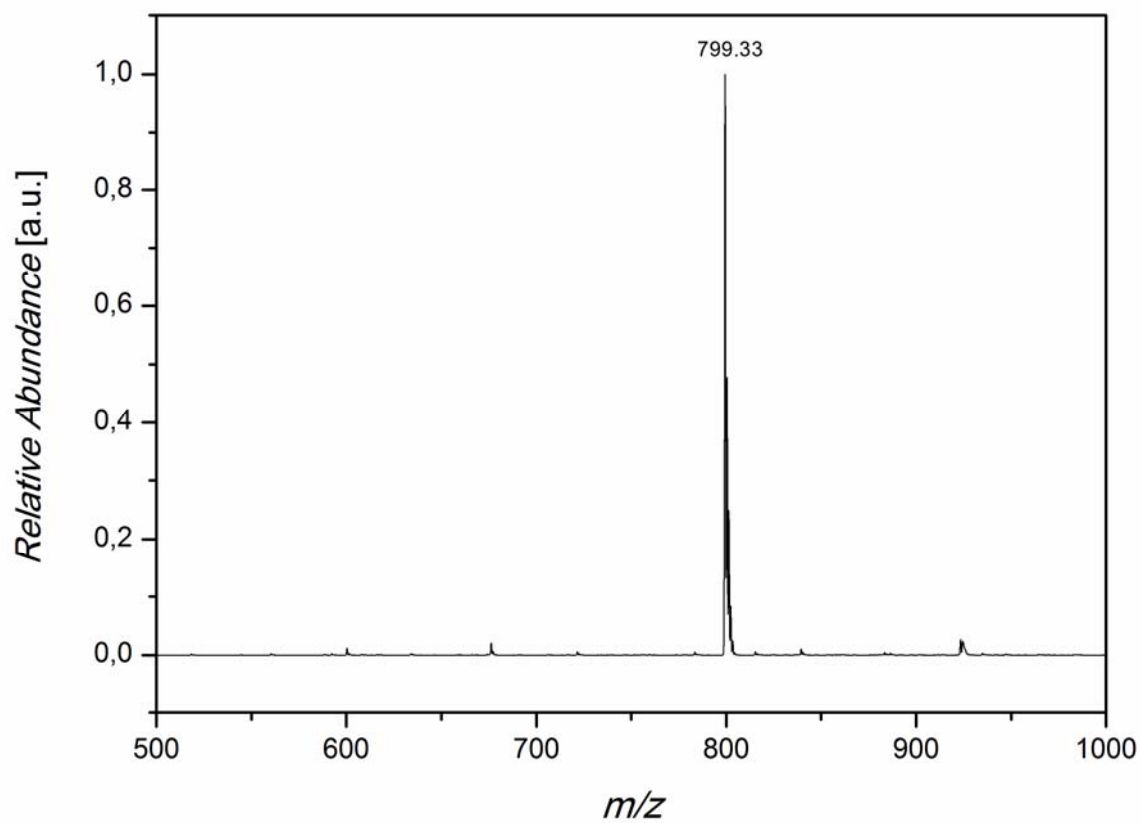

**Figure S5.** ESI-MS-spectrum of **CTA1** (ionized with NaI)

**Table S1.** Theoretical and experimental  $m/z$  of **CTA1** (ionized with NaI).

| Species                         | $m/z_{\text{theo}}$ | $m/z_{\text{exp}}$ | $\Delta m/z$ |
|---------------------------------|---------------------|--------------------|--------------|
| $[\text{CTA1} + \text{Na}^+]^+$ | 799.38              | 799.33             | 0.05         |

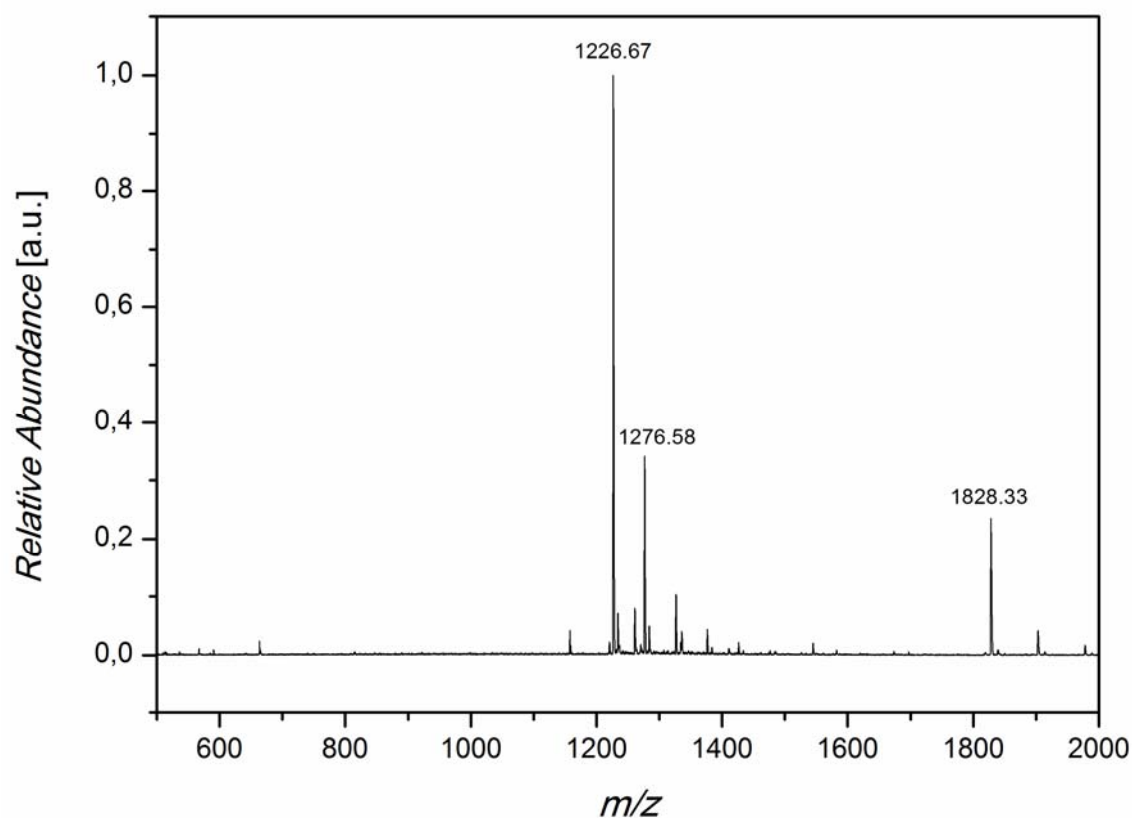

**Figure S6.** ESI-MS-spectrum of  $\beta$ -CD<sub>3</sub> (ionized with NaI).

**Table S2.** Theoretical and experimental  $m/z$  of  $\beta$ -CD<sub>3</sub> (ionized with NaI).

| Species                                            | $m/z_{\text{theo}}$ | $m/z_{\text{exp}}$ | $\Delta m/z$ |
|----------------------------------------------------|---------------------|--------------------|--------------|
| $[\beta\text{-CD}_3 + 2\text{Na}^+]^{2+}$          | 1828.09             | 1828.33            | 0.24         |
| $[\beta\text{-CD}_3 + 4\text{Na}^+ + \Gamma]^{3+}$ | 1276.66             | 1276.58            | 0.22         |
| $[\beta\text{-CD}_3 + 3\text{Na}^+]^{3+}$          | 1226.39             | 1226.67            | 0.28         |

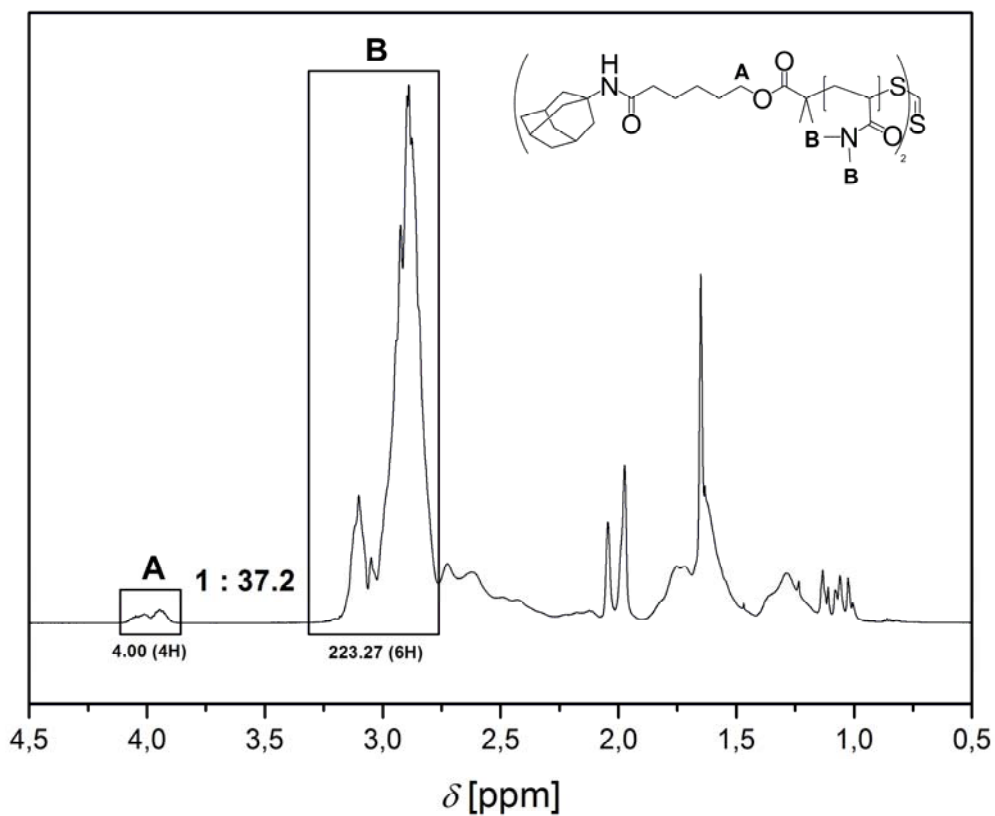

**Figure S7.** Exemplary calculation of the polymerization degree of PDMA<sub>37</sub>-ADA<sub>2</sub>.

**Table S3.** Calculated polymerization degrees ( $P_{n,NMR}$ ) and molecular weights ( $M_{n,NMR}$ ) of PDMA<sub>X</sub>-ADA<sub>2</sub> based on NMR data.

| Polymer                               | $P_{n,NMR}$ | $M_{n,NMR}$ [g mol <sup>-1</sup> ] |
|---------------------------------------|-------------|------------------------------------|
| PDMA <sub>37</sub> -ADA <sub>2</sub>  | 37.2        | 4500                               |
| PDMA <sub>122</sub> -ADA <sub>2</sub> | 122.4       | 12900                              |
| PDMA <sub>213</sub> -ADA <sub>2</sub> | 212.6       | 21900                              |
| PDMA <sub>307</sub> -ADA <sub>2</sub> | 306.9       | 31200                              |
| PDMA <sub>422</sub> -ADA <sub>2</sub> | 422,2       | 42600                              |



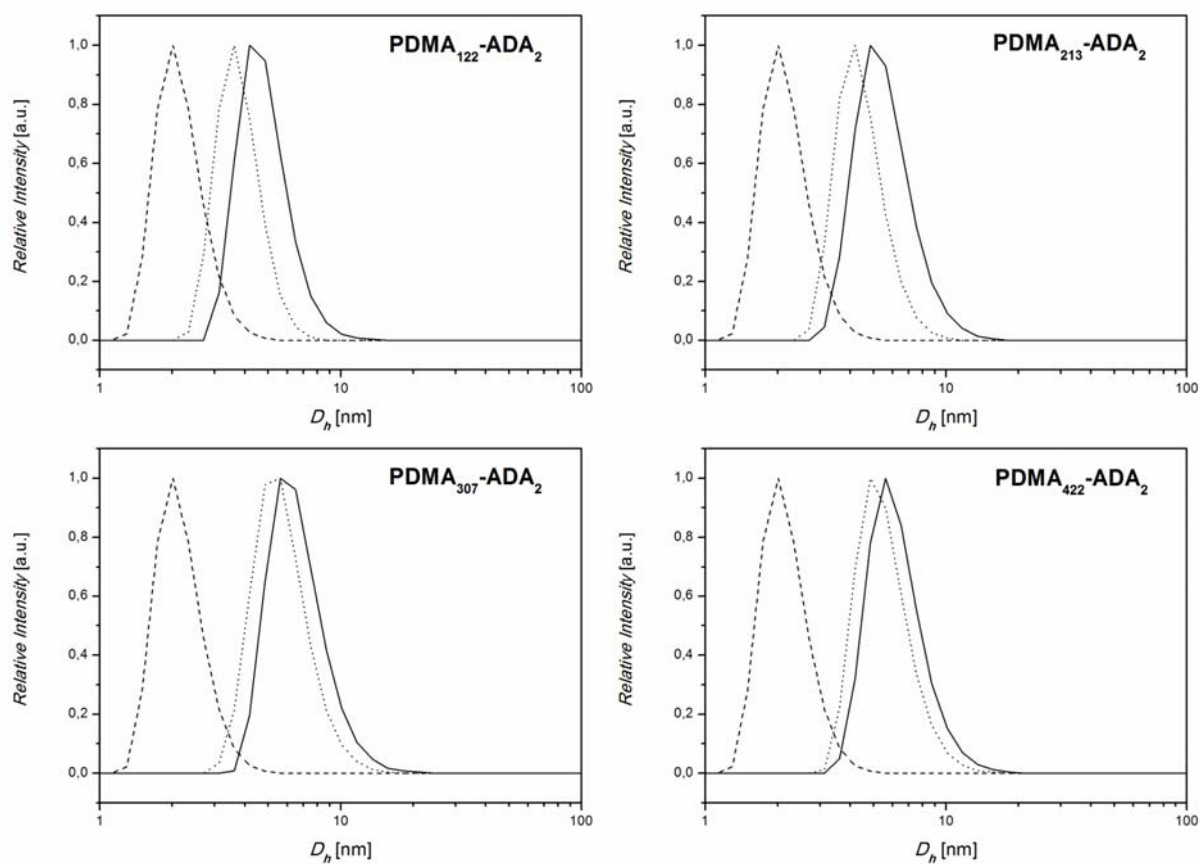

**Figure S8.** Number-weighted size distributions for the  $\beta$ -CD<sub>3</sub> trimer (dashed line), PDMA<sub>x</sub>-ADA<sub>2</sub> (dotted line), and the supramolecular complexes with an ADA/CD ratio of 1:1 (solid line) in water at 25 °C.

**Table S4.** Viscosity values in Pas derived from steady shear measurements of PDMA<sub>X</sub>-ADA<sub>2</sub> and  $\beta$ -CD<sub>3</sub> solutions depending on concentration at 20 °C.

| <b>Polymer</b>                        | <b>5 mM</b> | <b>10 mM</b> | <b>15 mM</b> | <b>20 mM</b> |
|---------------------------------------|-------------|--------------|--------------|--------------|
| $\beta$ -CD <sub>3</sub>              | 0.0035      | 0.0035       | 0.0035       | 0.0034       |
| PDMA <sub>37</sub> -ADA <sub>2</sub>  | 0.0035      | 0.0040       | 0.0043       | 0.0046       |
| PDMA <sub>122</sub> -ADA <sub>2</sub> | 0.0045      | 0.0075       | 0.0113       | 0.0146       |
| PDMA <sub>213</sub> -ADA <sub>2</sub> | 0.0051      | 0.0256       | 0.0435       | 0.0680       |
| PDMA <sub>307</sub> -ADA <sub>2</sub> | 0.0200      | 0.0907       | 0.2939       | 0.6976       |
| PDMA <sub>422</sub> -ADA <sub>2</sub> | 0.0325      | 0.1843       | 0.6847       | 2.3670       |

**Table S5.** Viscosity values in Pas derived from steady shear measurements of PDMA<sub>X</sub>-ADA<sub>2</sub>/ $\beta$ -CD<sub>3</sub> mixtures with a CD/ADA ratio of 1:2 depending on concentration at 20 °C.

| <b>Polymer</b>                        | <b>5 mM</b> | <b>10 mM</b> | <b>15 mM</b> | <b>20 mM</b> |
|---------------------------------------|-------------|--------------|--------------|--------------|
| PDMA <sub>37</sub> -ADA <sub>2</sub>  | 0.0040      | 0.0053       | 0.0068       | 0.0081       |
| PDMA <sub>122</sub> -ADA <sub>2</sub> | 0.0063      | 0.0125       | 0.0183       | 0.0263       |
| PDMA <sub>213</sub> -ADA <sub>2</sub> | 0.0126      | 0.0404       | 0.0889       | 0.1468       |
| PDMA <sub>307</sub> -ADA <sub>2</sub> | 0.0418      | 0.2116       | 0.8120       | 1.5850       |
| PDMA <sub>422</sub> -ADA <sub>2</sub> | 0.0694      | 0.4917       | 2.2080       | 4.0730       |

**Table S6.** Viscosity values in Pas derived from steady shear measurements of PDMA<sub>X</sub>-ADA<sub>2</sub>/β-CD<sub>3</sub> mixtures with a CD/ADA ratio of 2:2 depending on concentration at 20 °C.

| <b>Polymer</b>                        | <b>5 mM</b> | <b>10 mM</b> | <b>15 mM</b> | <b>20 mM</b> |
|---------------------------------------|-------------|--------------|--------------|--------------|
| PDMA <sub>37</sub> -ADA <sub>2</sub>  | 0.0048      | 0.0126       | 0.0327       | 0.0478       |
| PDMA <sub>122</sub> -ADA <sub>2</sub> | 0.0073      | 0.0165       | 0.0365       | 0.0561       |
| PDMA <sub>213</sub> -ADA <sub>2</sub> | 0.0281      | 0.1091       | 0.2190       | 0.3579       |
| PDMA <sub>307</sub> -ADA <sub>2</sub> | 0.0693      | 0.4432       | 1.1490       | 2.4330       |
| PDMA <sub>422</sub> -ADA <sub>2</sub> | 0.0967      | 0.5820       | 2.8440       | 5.9600       |

**Table S7.** Viscosity values in Pas derived from steady shear measurements of PDMA<sub>X</sub>-ADA<sub>2</sub>/β-CD<sub>3</sub> mixtures with a CD/ADA ratio of 3:2 depending on concentration at 20 °C.

| <b>Polymer</b>                        | <b>5 mM</b> | <b>10 mM</b> | <b>15 mM</b> | <b>20 mM</b> |
|---------------------------------------|-------------|--------------|--------------|--------------|
| PDMA <sub>37</sub> -ADA <sub>2</sub>  | 0.0058      | 0.0168       | 0.0423       | 0.0930       |
| PDMA <sub>122</sub> -ADA <sub>2</sub> | 0.0082      | 0.0247       | 0.0596       | 0.1346       |
| PDMA <sub>213</sub> -ADA <sub>2</sub> | 0.0379      | 0.1288       | 0.5327       | 0.8634       |
| PDMA <sub>307</sub> -ADA <sub>2</sub> | 0.1127      | 0.7722       | 3.4310       | 6.1830       |
| PDMA <sub>422</sub> -ADA <sub>2</sub> | 0.1850      | 1.6470       | 8.5040       | 11.7400      |

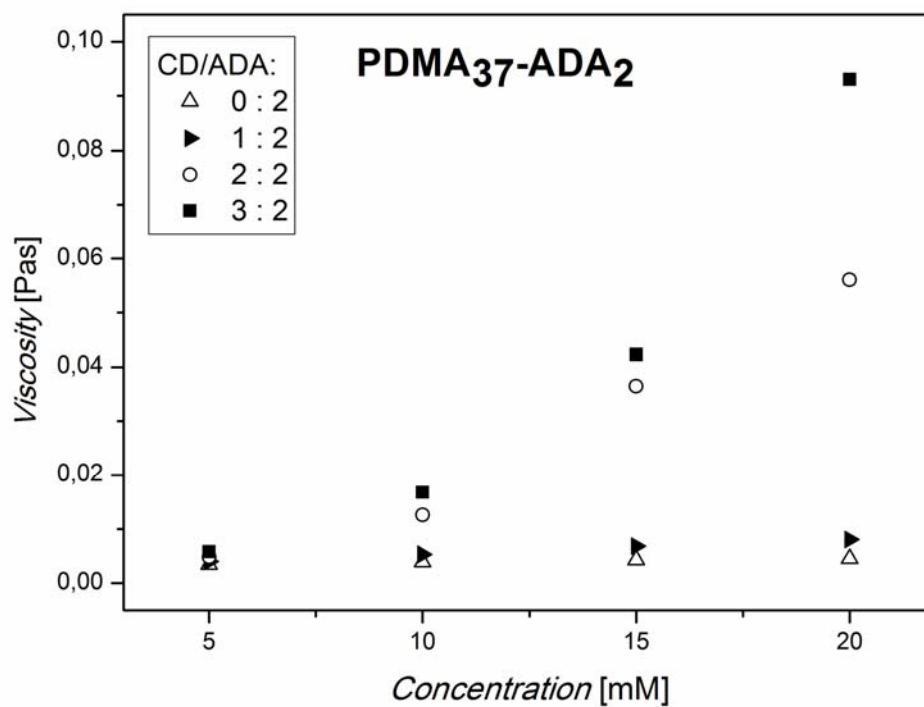

**Figure S9.** Viscosity values in Pas for PDMA<sub>37</sub>-ADA<sub>2</sub> and different CD/ADA ratios depending on the polymer concentration at 20 °C.

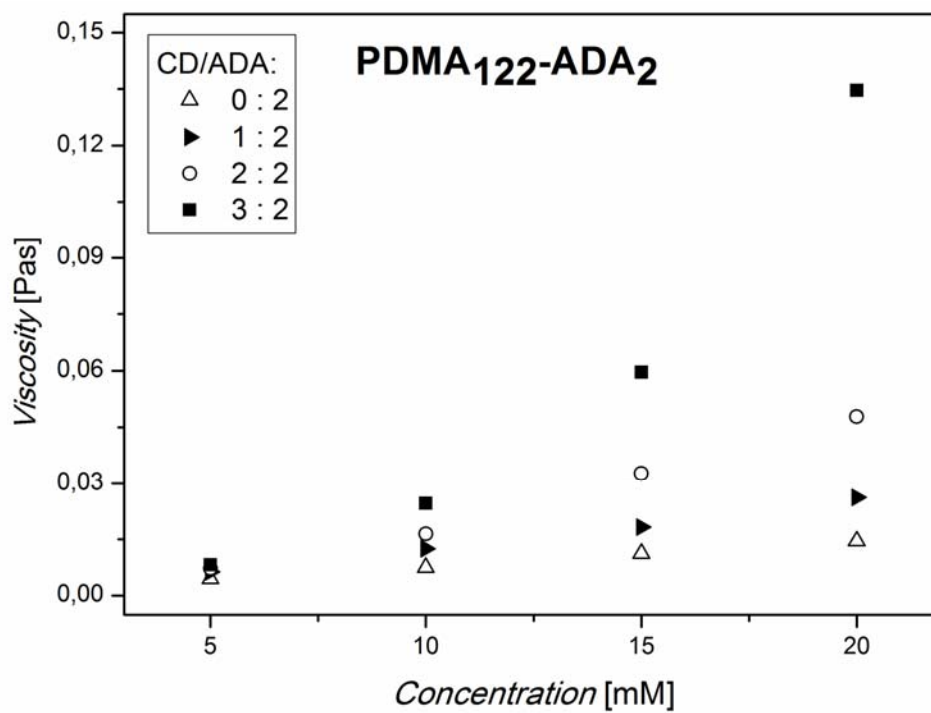

**Figure S10.** Viscosity values in Pas for PDMA<sub>122</sub>-ADA<sub>2</sub> and different CD/ADA ratios depending on the polymer concentration at 20 °C.

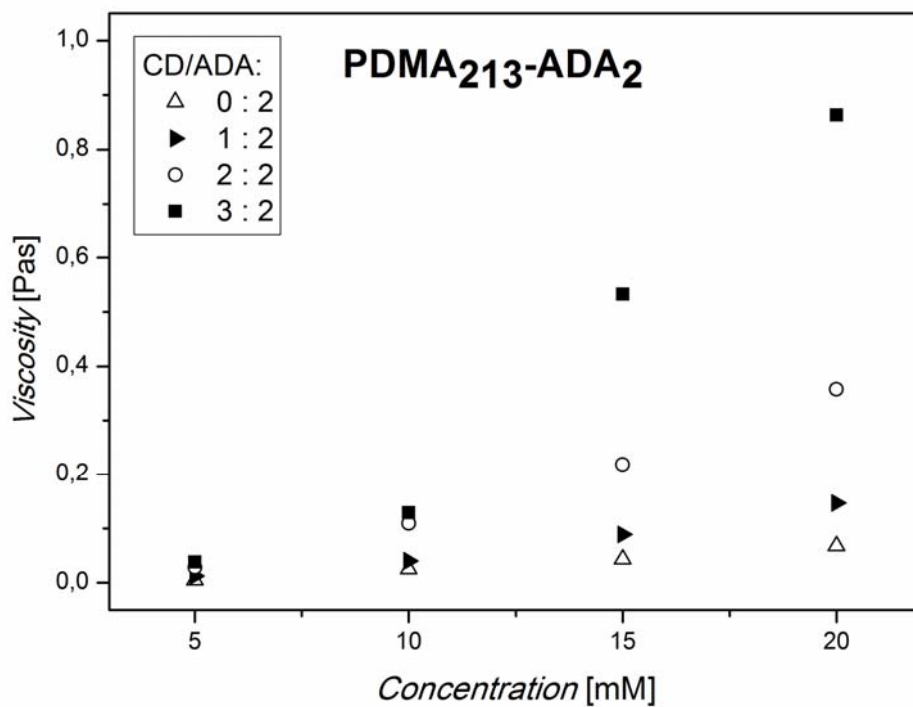

**Figure S11.** Viscosity values in Pas for PDMA<sub>213</sub>-ADA<sub>2</sub> and different CD/ADA ratios depending on the polymer concentration at 20 °C.

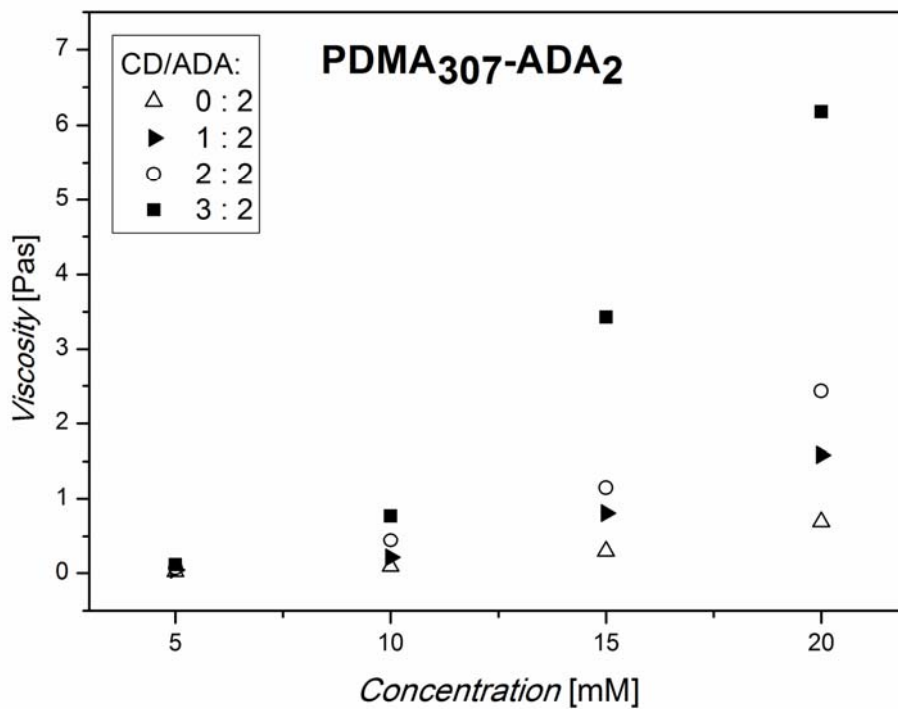

**Figure S12.** Viscosity values in Pas for PDMA<sub>307</sub>-ADA<sub>2</sub> and different CD/ADA ratios depending on the polymer concentration at 20 °C.

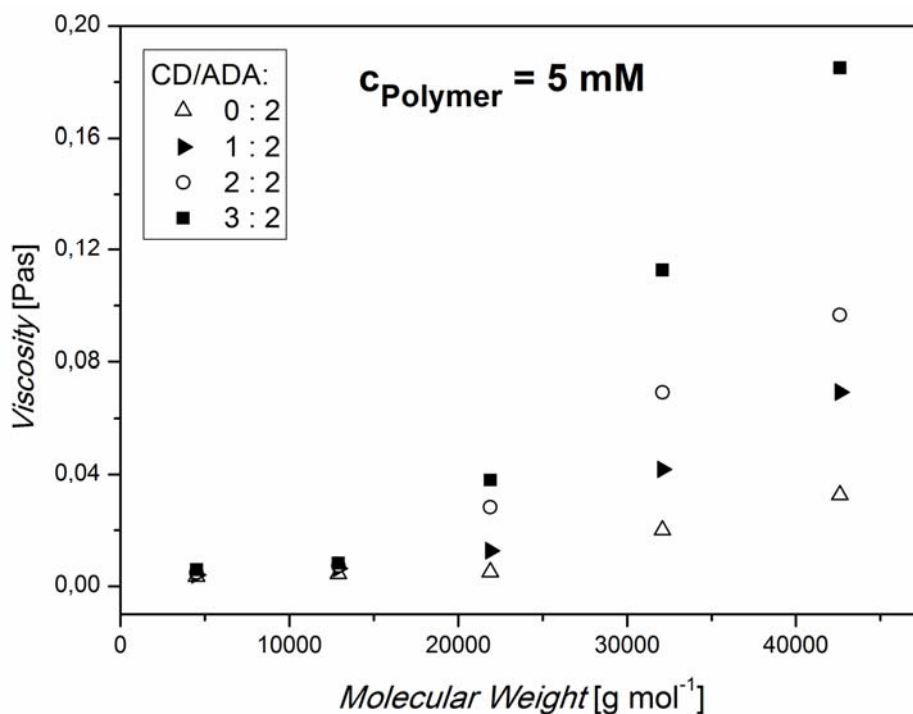

**Figure S13.** Viscosity values in Pas for  $c_{\text{Polymer}} = 5 \text{ mM}$  and different CD/ADA ratios depending on the molecular weight of PDMA<sub>X</sub>-ADA<sub>2</sub> at 20 °C.

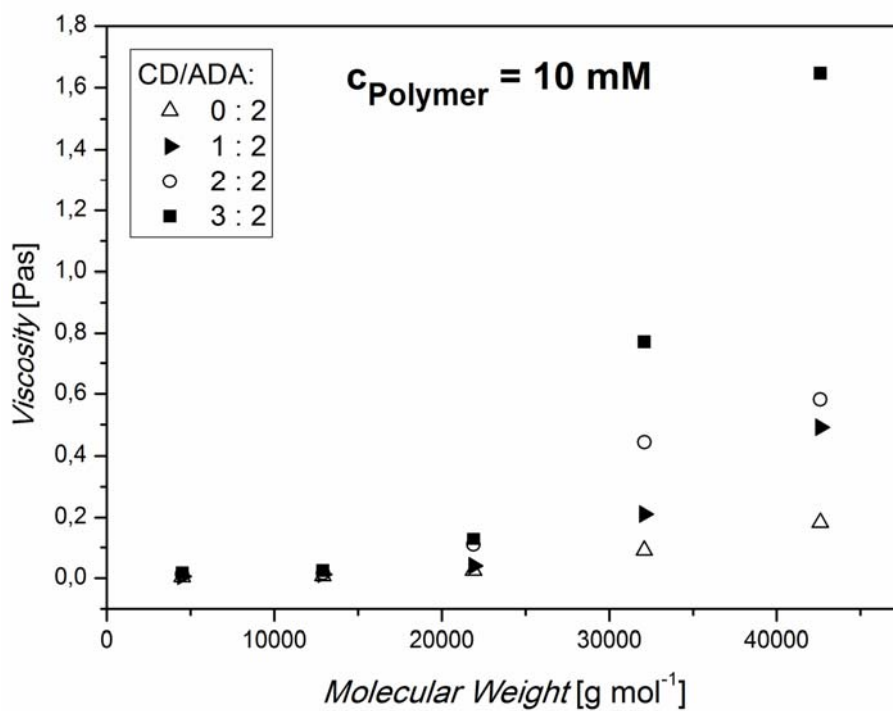

**Figure S14.** Viscosity values in Pas for  $c_{\text{Polymer}} = 10 \text{ mM}$  and different CD/ADA ratios depending on the molecular weight of PDMA<sub>X</sub>-ADA<sub>2</sub> at 20 °C.

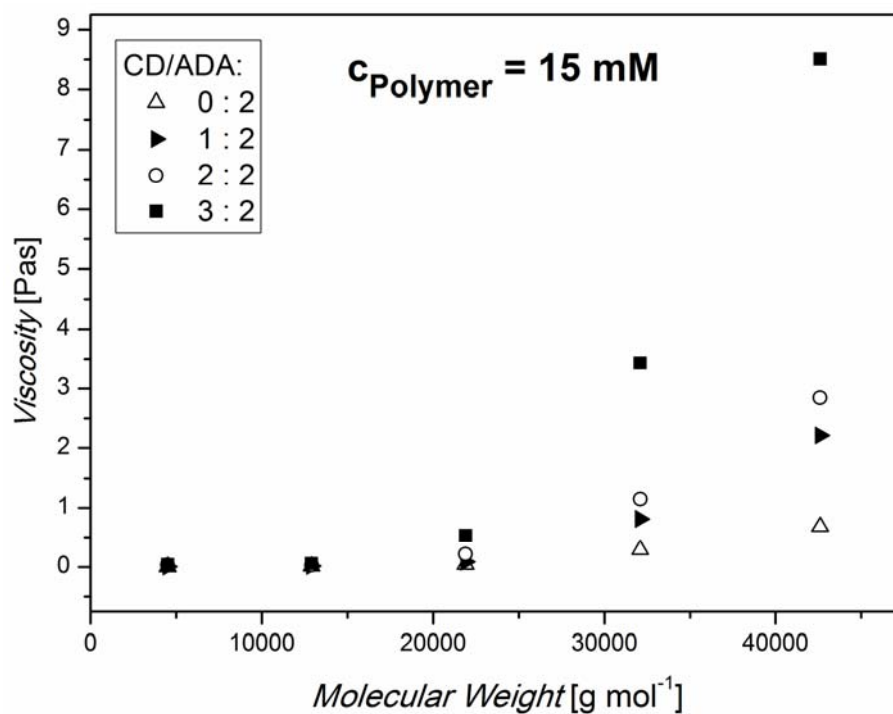

**Figure S15.** Viscosity values in Pas for  $c_{\text{Polymer}} = 15 \text{ mM}$  and different CD/ADA ratios depending on the molecular weight of PDMA<sub>X</sub>-ADA<sub>2</sub> at 20 °C.

## References

1. R. Dong, Y. Liu, Y. Zhou, D. Yan and X. Zhu, *Polym. Chem.*, 2011, **2**, 2771-2774.
2. B. V. K. J. Schmidt, T. Rudolph, M. Hetzer, H. Ritter, F. H. Schacher and C. Barner-Kowollik, *Polym. Chem.*, 2012, **3**, 3139-3145.
